# Supplementary material
Source: Springer Nature journal article supplement (https://www.springermedizin.de/resource/supplementary/12889_2009_1932_MOESM1_ESM.pdf/9484630)
Supplement: MOESM1 [file 9484630]

**1234 eligible women**

**134 delivered before interview  
or excluded because of  
language barrier  
26 not identified before birth  
9 refused**

**1065 women recruited**

**16 had multiple births  
40 had stillbirth  
2 migrated out of area  
1 died in pregnancy**

**1006 singleton babies born alive**

**64 infants died  
10 out-migrated before one year  
of age**

**932 singleton babies  
available at one year follow-up**

**Stool samples were not  
available from 24 mothers and  
27 children**

**908 mother child pairs were  
included in the analysis**
